# Supplementary material for: Interface engineering of palladium and zinc oxide nanorods with strong metal–support interactions for enhanced hydrogen production from base-free formaldehyde solution
Source: Royal Society of Chemistry journal article supplement (doi:10.1039/c8ta12019f), 2019-01-01
Supplement: c8ta12019f1.pdf [file c8ta12019f1.pdf]

## Electronic Supplementary Information

### **Interface Engineering of Palladium and Zinc Oxide Nanorods with Strong Metal-Support Interaction for Enhanced Hydrogen Production from Base-free Formaldehyde Solution**

Leilei Du<sup>a</sup>, Kaicheng Qian<sup>a</sup>, Xiaohui Zhu<sup>a</sup>, Xiaoqing Yan,<sup>b</sup> Hisayoshi Kobayashi<sup>c,\*</sup>, Zhiqi Liu<sup>a</sup>, Yupeng Lou<sup>a</sup>, Renhong Li<sup>a,\*</sup>

<sup>a</sup>Department of Materials Engineering, College of Material Textiles, Zhejiang Sci-Tech University, Hangzhou 310018, China

<sup>b</sup>Department of Chemistry, College of Science, Zhejiang Sci-Tech University, Hangzhou 310018, China

<sup>c</sup>Department of Chemistry and Materials Technology, Kyoto Institute of Technology, Matsugasaki, Sakyo-ku, Kyoto 606-8585, Japan

Corresponding Author

\*E-mail: [lirenhong@zstu.edu.cn](mailto:lirenhong@zstu.edu.cn); [hisabbit@yahoo.co.jp](mailto:hisabbit@yahoo.co.jp)

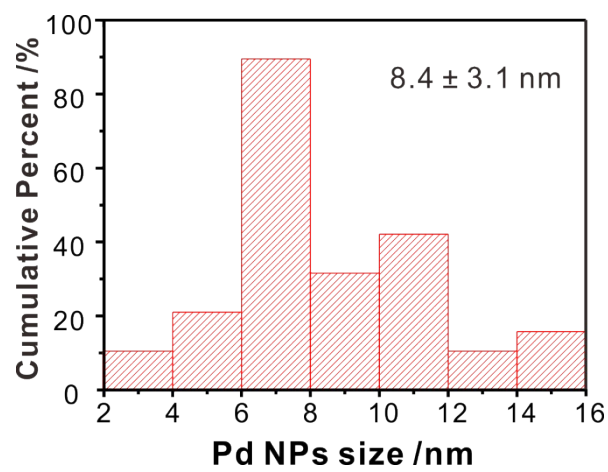

**Figure S1.** The size distribution of Pd NPs.

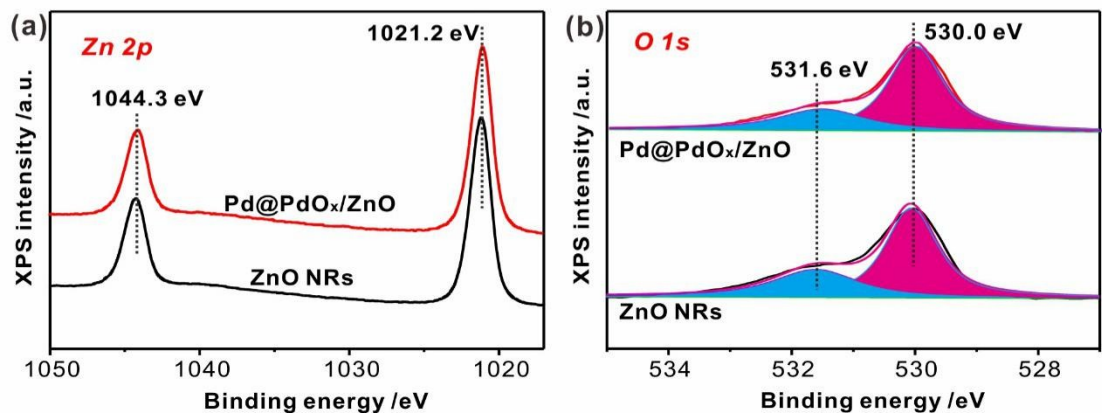

**Figure S2.** (a) Zn 2p and (b) O 1s XPS spectra of ZnO nanorods and Pd@PdO<sub>x</sub>/ZnO.

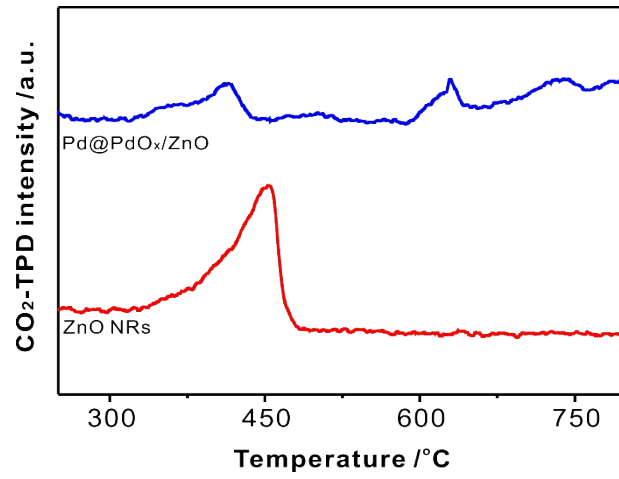

**Figure S3.** The CO<sub>2</sub>-TPD spectra of ZnO nanorods and Pd@PdO<sub>x</sub>/ZnO..

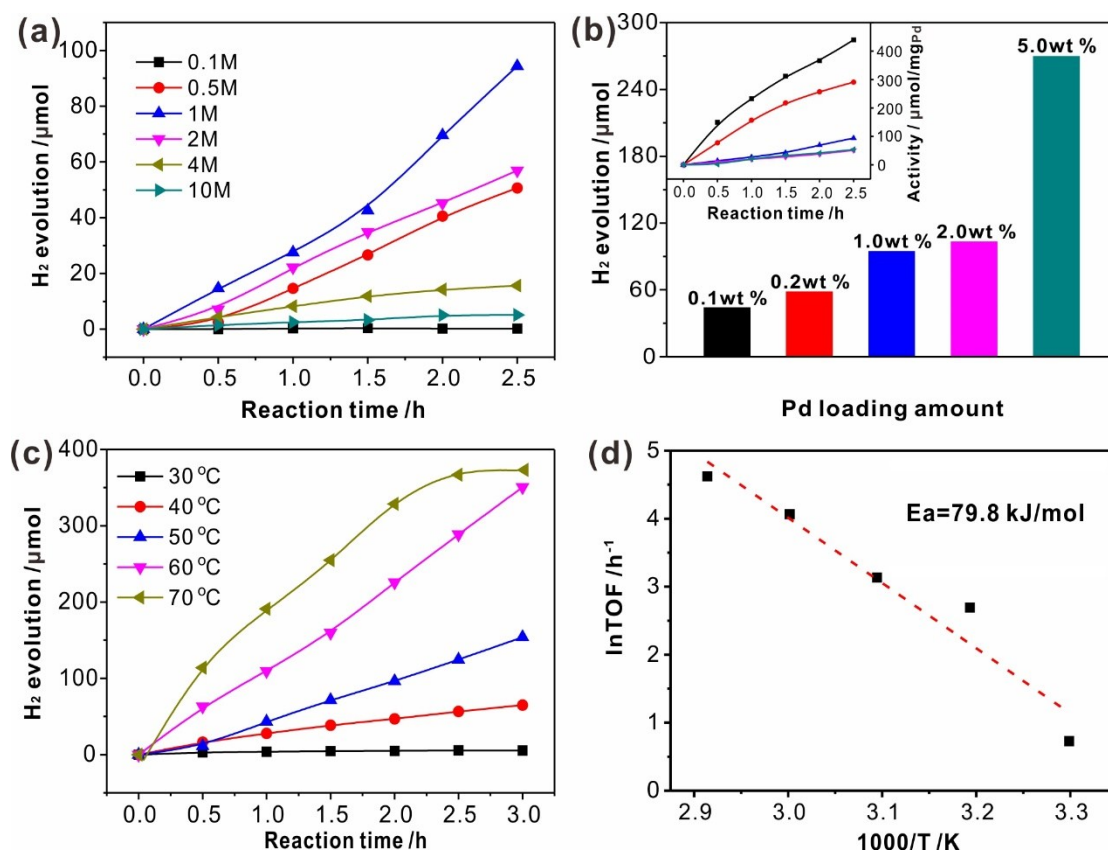

**Figure S4.** The effect of (a) formaldehyde concentration, (b) Pd loading amount (inset shows the Pd@PdO<sub>x</sub>/ZnO mass activity,  $t = 50$  °C) and (c) reaction temperature on the rate of H<sub>2</sub> evolution; (d) corresponding Arrhenius plots. All catalytic H<sub>2</sub> production experiments were carried out in N<sub>2</sub> atmosphere.

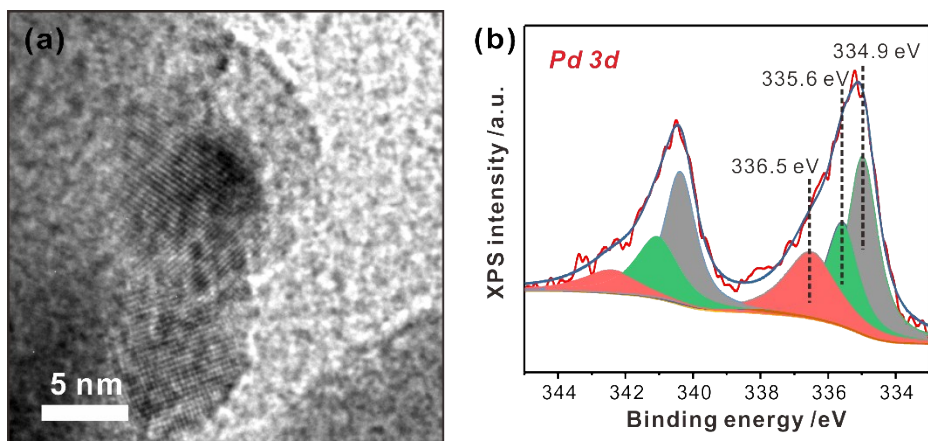

**Figure S5.** (a) HR-TEM image and (b) Pd 3d XPS spectrum of the Pd@PdO<sub>x</sub>/ZnO catalyst after reaction.

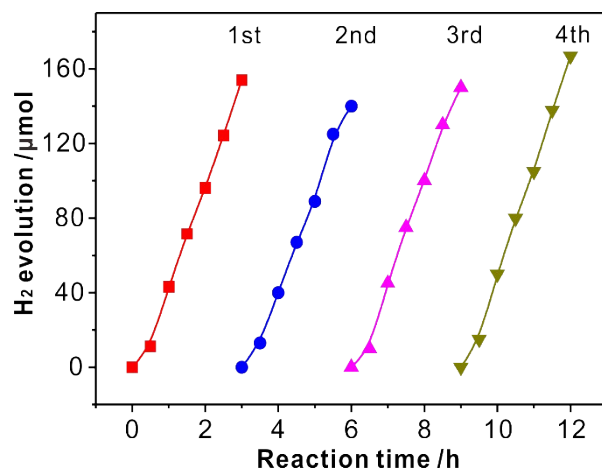

**Figure S6.** The cycle performance of the Pd@PdO<sub>x</sub>/ZnO catalyzes the hydrogen production of formaldehyde solution.

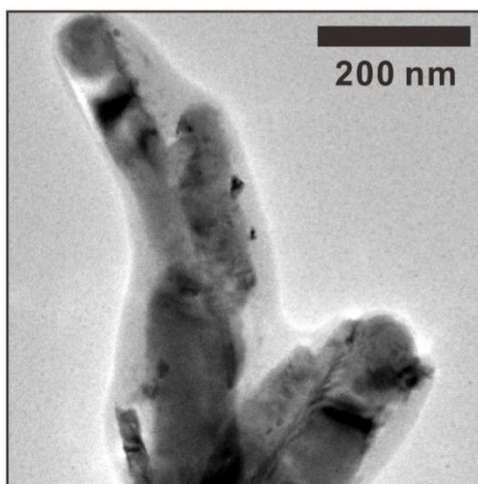

**Figure S7.** TEM image of ZnO/Pd@PdO<sub>x</sub>/ZnO.



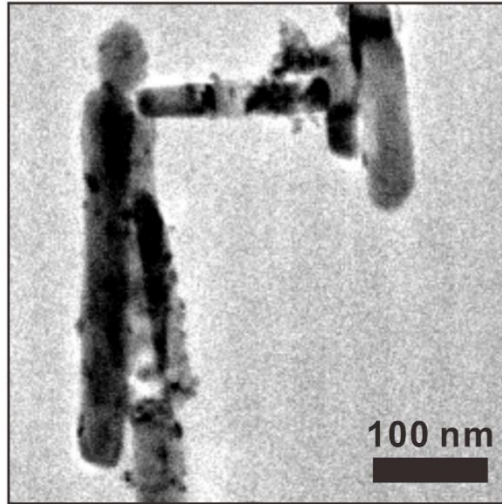

**Figure S8.** TEM image of PdPt@PdO<sub>x</sub>/ZnO.

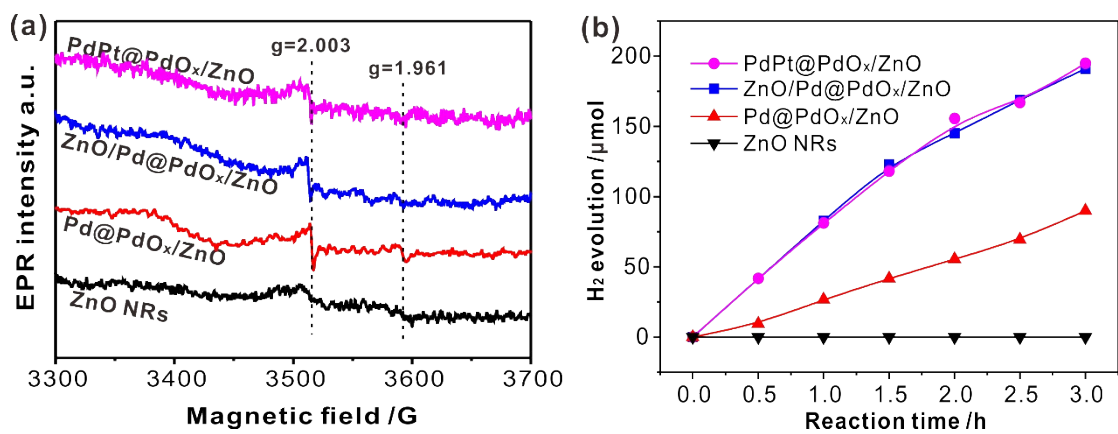

**Figure S9.** (a) Solid EPR spectra of different samples carried out at 25 °C in open air and (b) corresponding samples catalyzed H<sub>2</sub> evolution from HCHO solution.

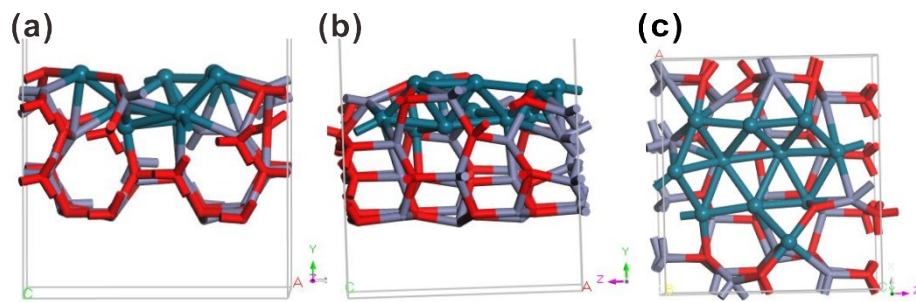

**Figure S10.** (a-c) Three views of  $\text{Pd}_{11}(\text{ZnO})_{26}$  unit cell from different directions.

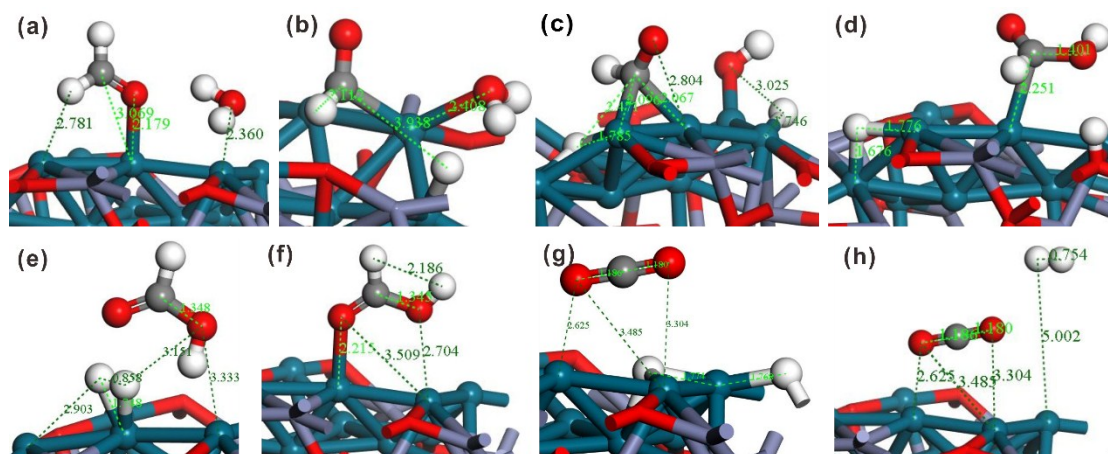

**Figure S11.** (a) Optimized structure for  $\text{H}_2\text{CO}$  and  $\text{H}_2\text{O}$  (Conf.#1). (b) Optimized structure for H,  $\text{HCO}$ , and  $\text{H}_2\text{O}$  (Conf.#3). (c) Optimized structure for  $\text{HCO}$ ,  $\text{OH}$  and two H (Conf.#5). (d) Optimized structure for two H and  $\text{HCOOH}$  (Conf.#7). (e) Optimized structure for  $\text{H}_2$  formed from two adsorbed H atoms, and generated  $\text{HCOOH}$  (Conf.#9). (f) Optimized structure for  $\text{HCOOH}$  (Conf.#10). (g) Optimized structure for 2H and generated  $\text{CO}_2$  (Conf.#12). (h) Optimized structure for weakly adsorbed  $\text{H}_2$  and  $\text{CO}_2$  (Conf.#14).
